# Supplementary material for: Rapid Discrimination and Prediction of Ginsengs from Three Origins Based on UHPLC-Q-TOF-MS Combined with SVM
Source: MDPI journal article supplement (doi:10.3390/molecules27134225), 2022-06-30
Supplement: s1 [file s1]

## Supplementary Materials

# Rapid Discrimination and Prediction of Ginsengs from Three Origins Based on UHPLC-Q-TOF-MS Combined with SVM

Chi Zhang <sup>1,2,†</sup>, Zhe Liu <sup>1,3,†</sup>, Shaoming Lu <sup>1,2</sup>, Liujun Xiao <sup>1,2</sup>, Qianqian Xue <sup>1,2,\*</sup>, Hongli Jin <sup>1,2,\*</sup>, Jiapan Gan <sup>1,2</sup>,  
Xiaonong Li <sup>2</sup>, Yanfang Liu <sup>1,2</sup> and Xinmiao Liang <sup>1,2</sup>

<sup>1</sup> CAS Key Laboratory of Separation Science for Analytical Chemistry, Dalian Institute of Chemical Physics, Chinese Academy of Sciences, Dalian 116023, China; zhangchi@jcm-sc.cn (C.Z.); liuzhe@dicp.ac.cn (Z.L.); lushaoming@jcm-sc.cn (S.L.); xiaoliujun@jcm-sc.cn (L.X.); ganjiapan@jcm-sc.cn (J.G.); liuyanfang@jcm-sc.cn (Y.L.); liangxm@dicp.ac.cn (X.L.)

<sup>2</sup> Jiangxi Provincial Key Laboratory for Pharmacodynamic Material Basis of Traditional Chinese Medicine, Ganjiang Chinese Medicine Innovation Center, Nanchang 330000, China; lixiaonong@jcm-sc.cn

<sup>3</sup> University of Chinese Academy of Sciences, Beijing 100049, China

\* Correspondence: xueqianqian@jcm-sc.cn (Q.X.); jinhongli@jcm-sc.cn (H.J.)

† These authors contributed equally to this work.

Figure S1 Optimization of UHPLC-MS analysis conditions. (A: the optimization of extraction solvents , B: the optimization of mobile phase (mobile phase 1: water-acetonitrile, mobile phase 2: water (contain 0.01% formic acid)-acetonitrile (contain 0.01% formic acid) , C: the optimization of elution gradient (Gradient 1: 0~10 min, 19% B; 10~16 min, 19%~28% B; 16~35 min, 28~35% B, Gradient 2: 0~8 min, 19% B; 8~13 min, 19%~21% B; 13~14 min, 21%~25%; 14~20 min, 25%~29% B; 20~34 min, 29% B; 34~35 min, 29%~32% B; 35~42 min, 32%~40% B, Gradient 3: 0~10 min, 19% B; 10~16 min, 19%~28% B; 16~30 min, 28~34% B; 30~31 min, 34%~90% B; 31~35 min, 90%~90% B. D: the optimization of injection concentration).

Figure S2 TIC of ginseng sample by UHPLC-Q-TOF-MS(Take a QC sample as an example).

Figure S3 The MS/MS spectra of ginsenosides: (A)PPT, protopanaxatriol-type; (B)PPD, protopanaxadiol-type; (C)OA, oleanane-type.

Figure S4 The full scan mode and MS/MS mode of six compounds, including Compound 13(ginsenoside Rg1), Compound 14(ginsenoside Re), Compound 27(ginsenoside Rf), Compound 46(ginsenoside Rb1), Compound 50(ginsenoside Rc), Compound 56(ginsenoside Rb2).

Figure S5 A presentation of 200 times permutation test for PLS-DA analysis.

Figure S6 Distribution of six peaks in ginseng from three different origins.

Table S1 Stability and repeatability of UHPLC-Q-TOF-MS.

Table S2 The classified and predicted results of ginsengs from three geographical origins using SVM model six quality markers.

In order to achieve good separation effect and obtain high-quality UHPLC-Q-TOF-MS data, we optimized the extraction solvents, composition of mobile phase, elution gradient and injection concentration in detail during UHPLC-Q-TOF-MS analysis.

Firstly, different extraction solvents, including methanol, 70% methanol, 40% ethanol and ethanol, were investigated to achieve maximum extraction. The results showed that the 40% ethanol is more suitable for the extraction of ginseng because of its high extraction efficiency and environmental protection (Figure S1, A). Additionally, the chromatographic conditions including mobile phase and elution gradient were optimized to increase the separation. Consequently, water (contain 0.01% formic acid, v:v) -acetonitrile (contain 0.01% formic acid, v:v) and gradient 3 (0 ~ 10 min, 19% B; 10 ~ 16 min, 19% ~ 28% B; 16 ~ 30 min, 28 ~ 34% B; 30 ~ 31 min, 34% ~ 90% B; 31 ~ 35 min, 90% ~ 90% B.) were preferred as the most suitable mobile phase system and elution gradient due to more peak numbers and better resolution (Figure S1, B~C). Finally, the chromatographic conditions was used to gather the UHPLC-Q-TOF-MS data, and the injection concentration of 20000 ppm can obtain excellent response and will not burden the instrument by comparing the spectral profile 20 ppm, 10000 ppm and 20000 ppm (Figure S1, D).

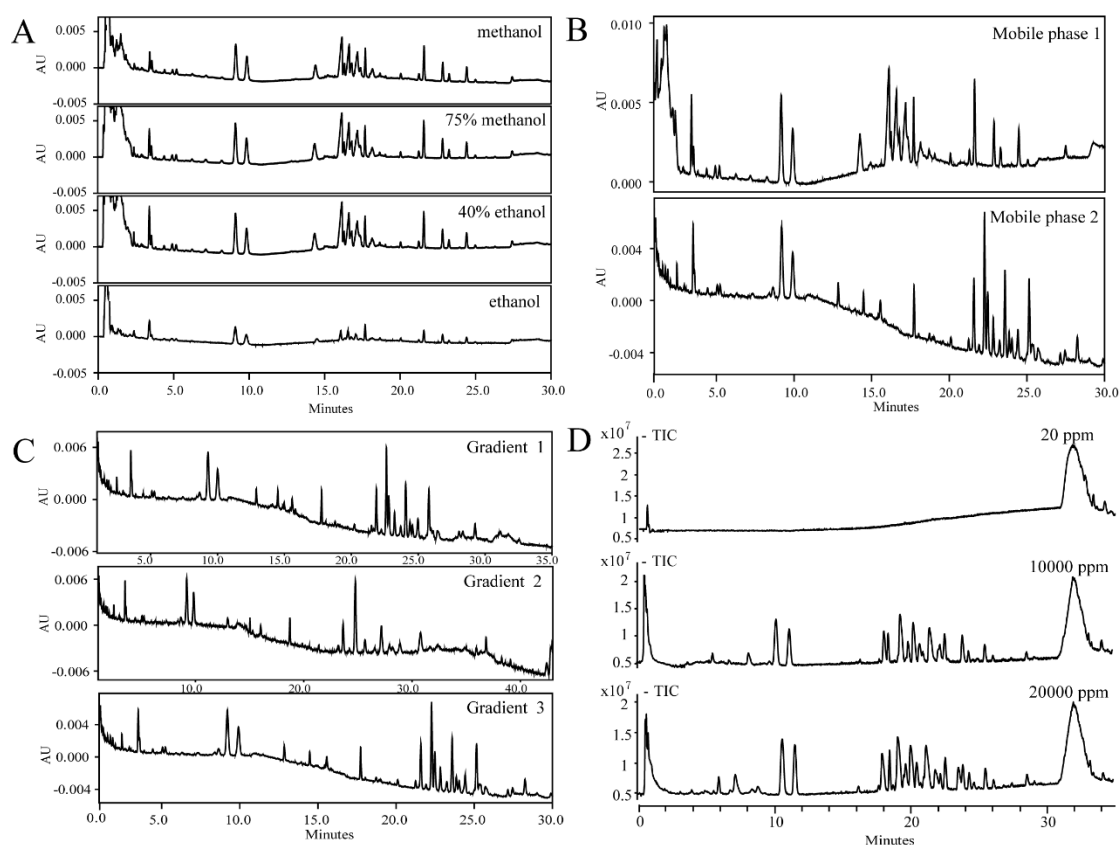

**Figure S1.** Optimization of UHPLC-MS analysis conditions. (A: the optimization of extraction solvents , B: the optimization of mobile phase (mobile phase 1: water- acetonitrile, mobile phase 2: water (contain 0.01% formic acid)-acetonitrile (contain 0.01% formic acid) , C: the optimization of elution gradient (Gradient 1: 0~10 min, 19% B; 10~16 min, 19%~28% B; 16~35 min, 28~35% B, Gradient 2: 0~8 min, 19% B; 8~13 min, 19%~21% B; 13~14 min, 21%~25%; 14~20 min, 25%~29% B; 20~34 min, 29% B; 34~35 min, 29%~32% B; 35~42 min, 32%~40% B, Gradient 3: 0~10 min, 19% B; 10~16 min, 19%~28% B; 16~30 min, 28~34% B; 30~31 min,

34%~90% B; 31~35 min, 90%~90% B. D: the optimization of injection concentration).

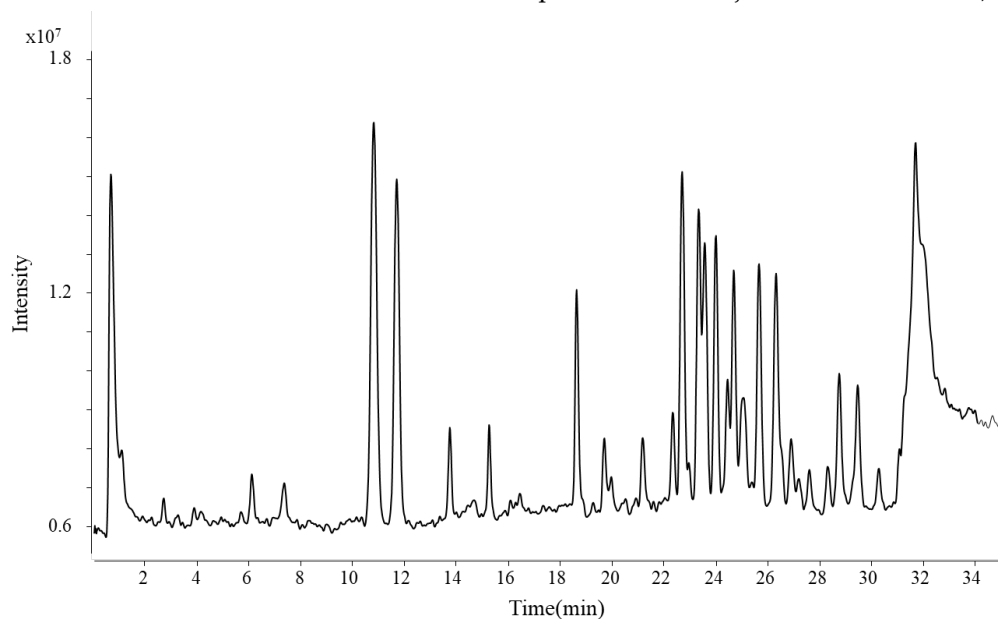

**Figure S2.** TIC of ginseng sample by UHPLC-Q-TOF-MS(Take a QC sample as an example).

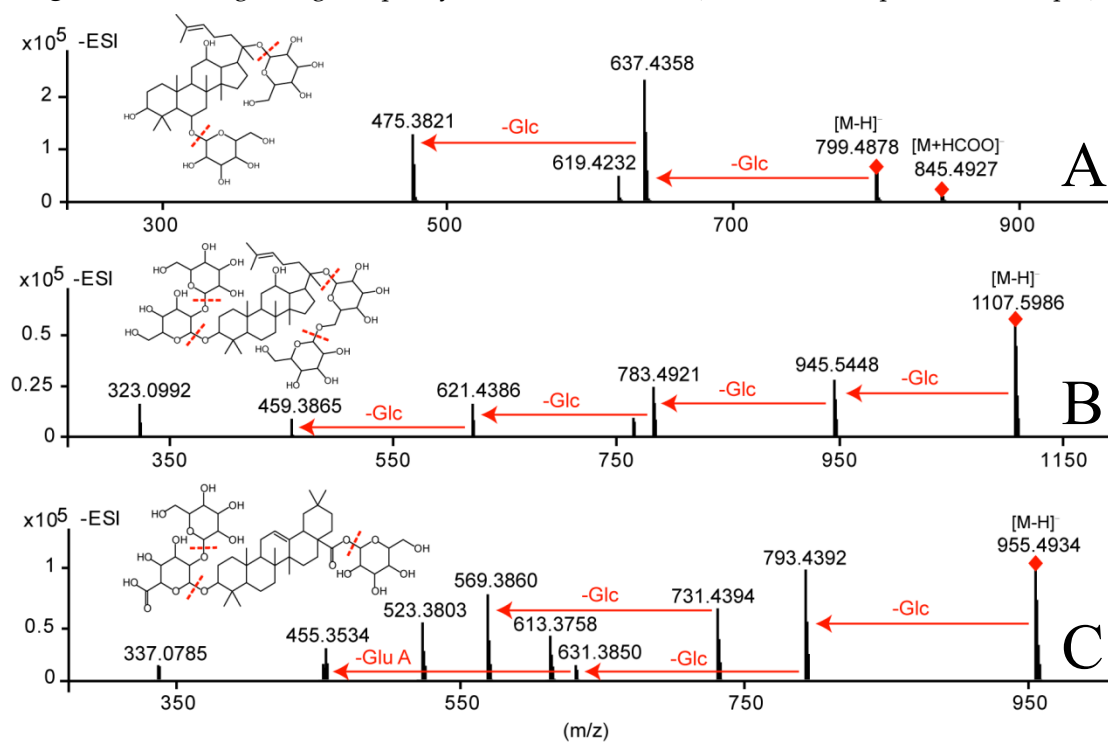

**Figure S3.** The MS/MS spectra of ginsenosides: (A)PPT, protopanaxatriol-type; (B)PPD, protopanaxadiol-type; (C)OA, oleanane-type.

## Compound 13(ginsenoside Rg1)

MS 845.4910[M+COOH]<sup>-</sup>

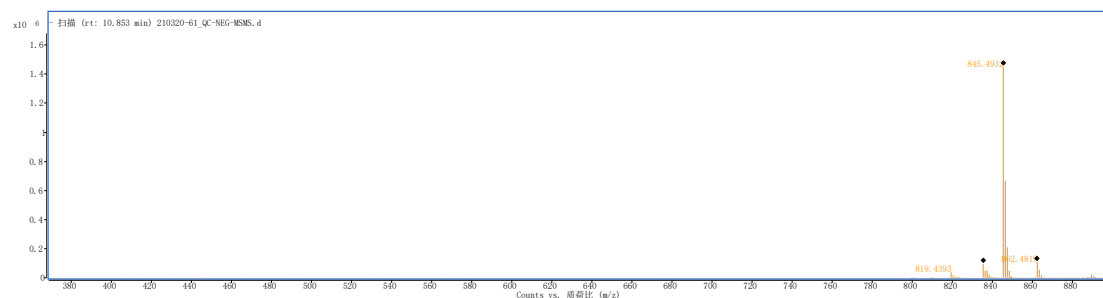

MS/MS 799.4852[M-H]<sup>-</sup>; 637.4337[M-H-Glc]<sup>-</sup>; 619.4215[M-H-Glc-O]<sup>-</sup>; 475.3802[M-H-Glc-Glc]<sup>-</sup>

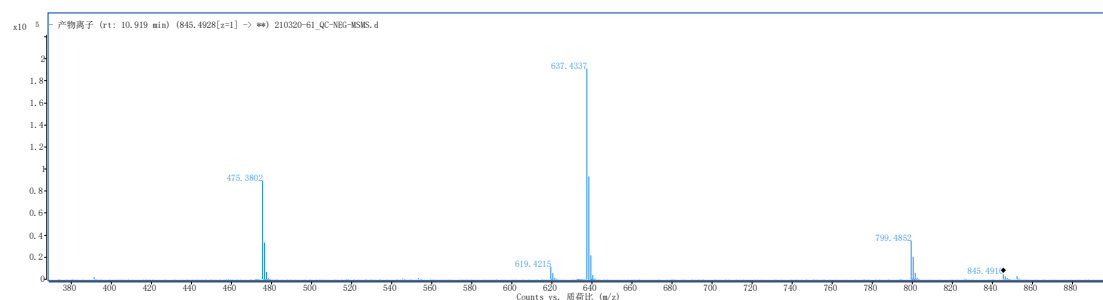

## Compound 14(ginsenoside Re)

MS 945.5475[M-H]<sup>-</sup>

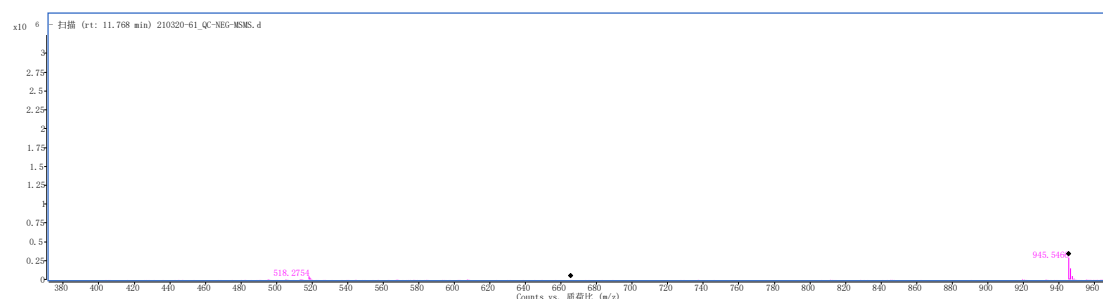

MS/MS 799.4880[M-H-Rha]<sup>-</sup>; 783.4926[M-H-Glc]<sup>-</sup>; 765.4816[M-H-Glc-H<sub>2</sub>O]<sup>-</sup>; 637.4346[M-H-Glc-Rha]<sup>-</sup>; 619.4264[M-H-Glc-Rha-O]<sup>-</sup>; 475.3818[M-H-Glc-Glc-Rha]<sup>-</sup>

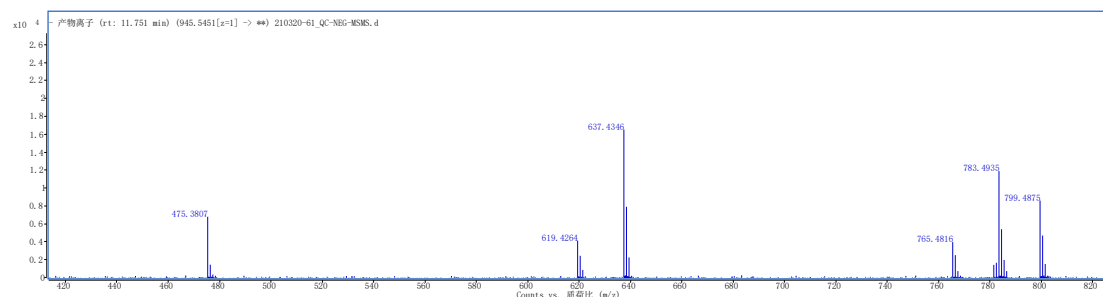

Compound 27(ginsenoside Rf)

MS 799.4873[M-H]<sup>-</sup>

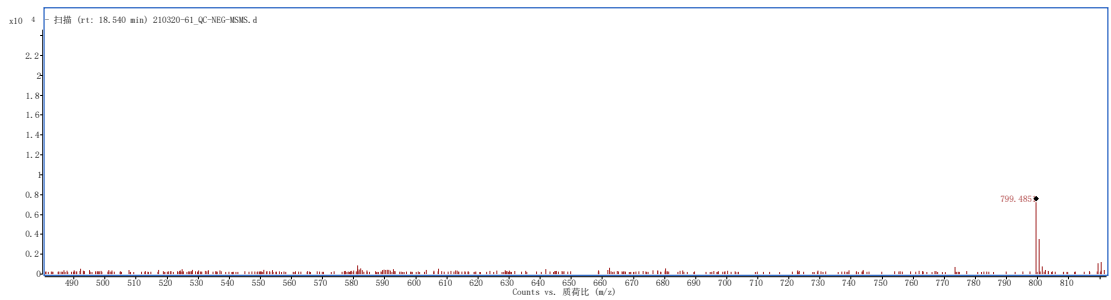

MS/MS 637.4327[M-H-Glc]<sup>-</sup>; 475.3796[M-H-Glc-Glc]<sup>-</sup>

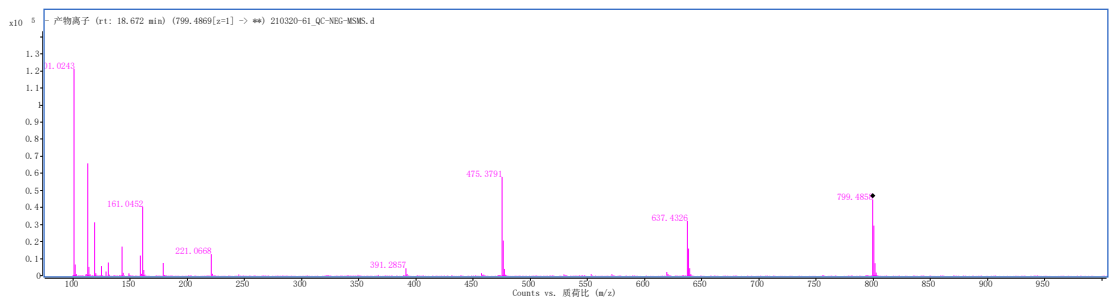

Compound 46(ginsenoside Rb1)

MS 1107.6022[M-H]<sup>-</sup>;

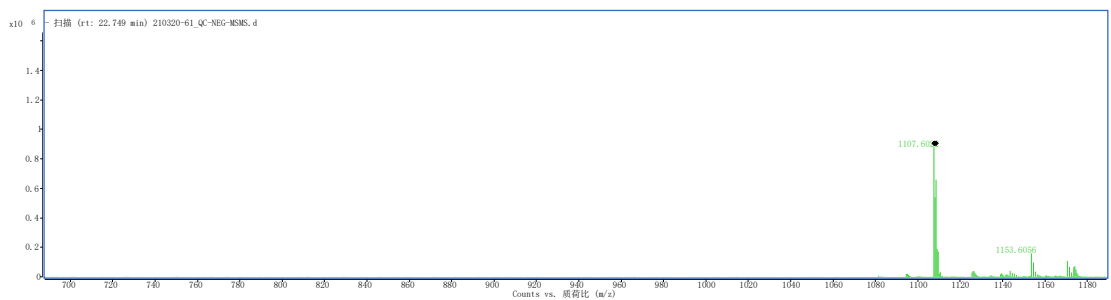

MS/MS 945.5438[M-H-Glc]<sup>-</sup>; 783.4904[M-H-Glc-Glc]<sup>-</sup>

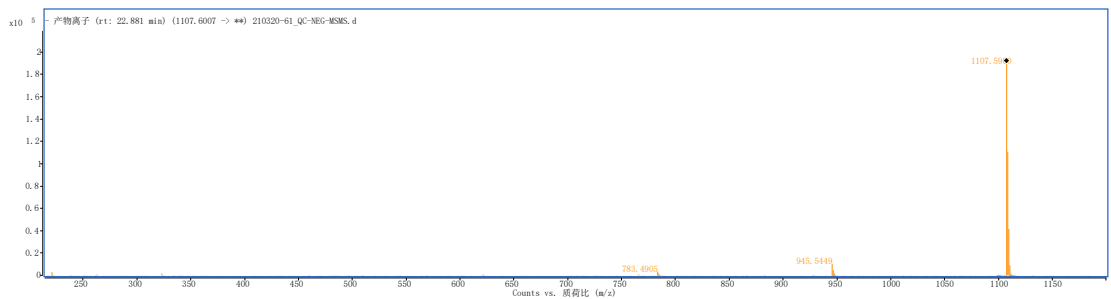

Compound 50(ginsenoside Rc)

MS 1077.5897[M-H]<sup>-</sup>

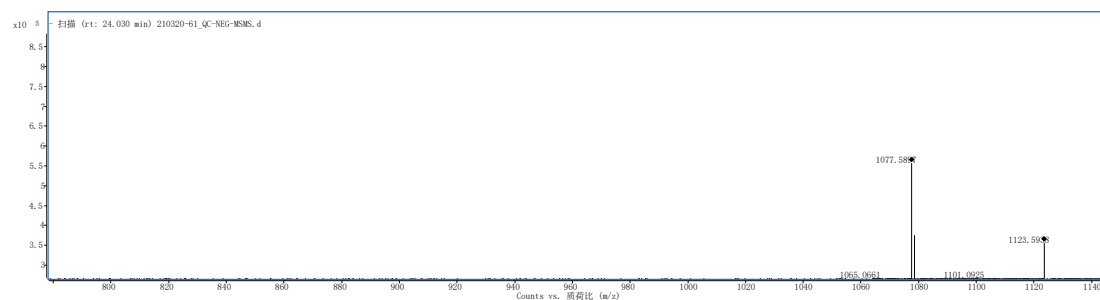

MS/MS 945.5412[M-H-Ara]<sup>-</sup>; 783.4910[M-H-Ara-Glc]<sup>-</sup>

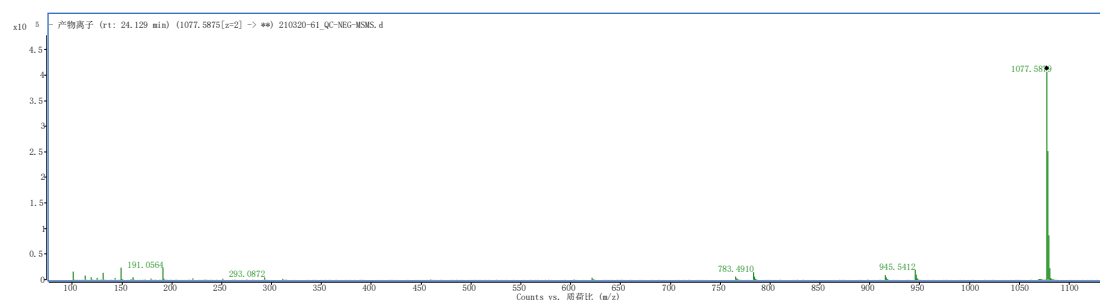

Compound 56(ginsenoside Rb2)

MS 1077.5859 [M-H]<sup>-</sup>

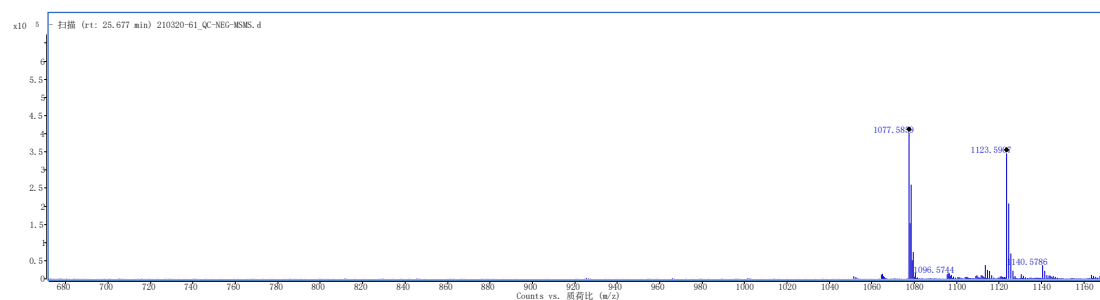

MS/MS 945.5412[M-H-Ara]<sup>-</sup>; 783.4910[M-H-Ara-Glc]<sup>-</sup>

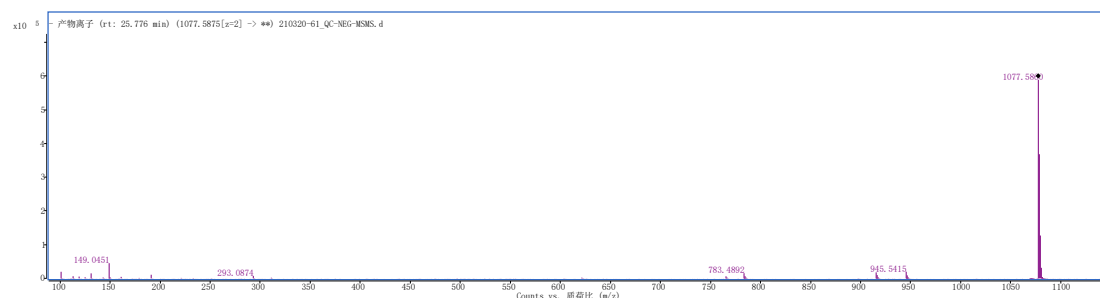

**Figure S4.** The full scan mode and MS/MS mode of six compounds, including Compound 13(ginsenoside Rg1), Compound 14(ginsenoside Re), Compound 27(ginsenoside Rf), Compound 46(ginsenoside Rb1), Compound 50(ginsenoside Rc), Compound 56(ginsenoside Rb2).

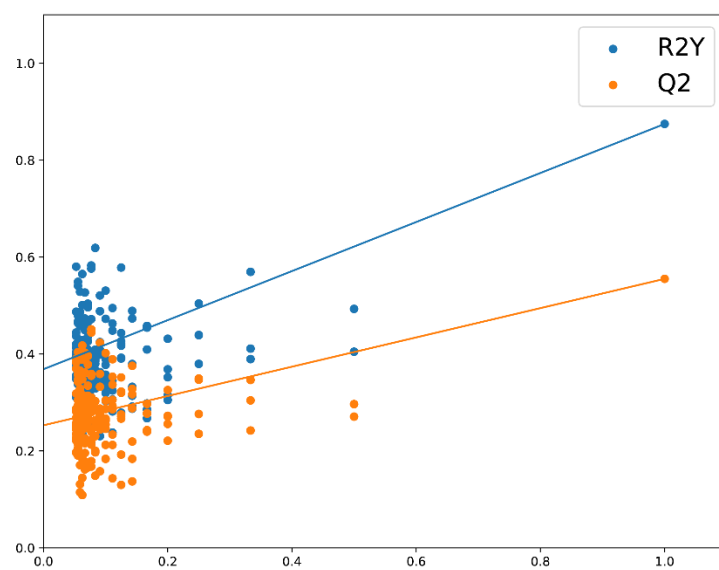

**Figure S5.** A presentation of 200 times permutation test for PLS-DA analysis.

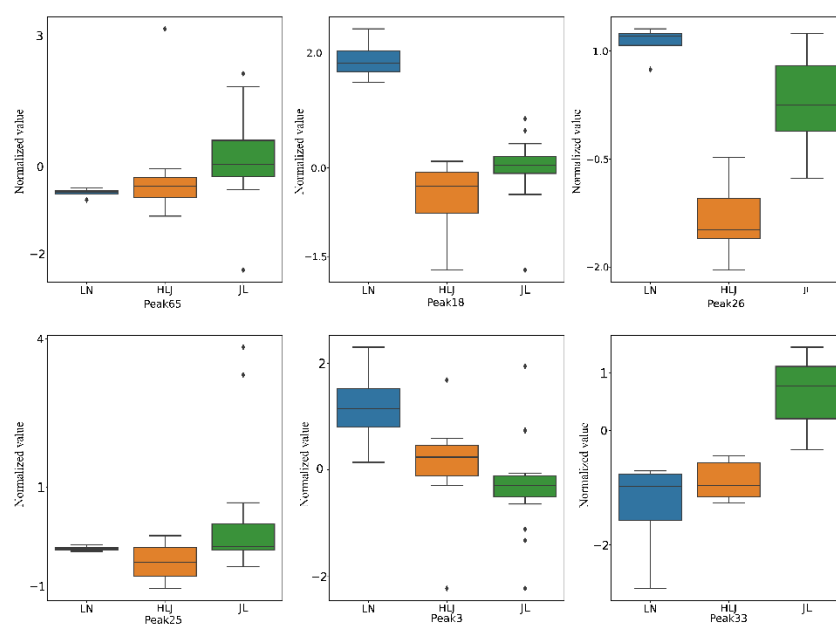

**Figure S6.** Distribution of six peaks in ginseng from three different origins.



**Table S1.** Stability and repeatability of UHPLC-Q-TOF-MS.

|              |             | QC-2       | QC-13      | QC-19      | QC-25      | QC-31      | QC-37      | QC-43      | QC-49      | QC-55      | QC-60      | RSD (%)               |
|--------------|-------------|------------|------------|------------|------------|------------|------------|------------|------------|------------|------------|-----------------------|
| peak 13(Rg1) | MS accuracy | 800.49298  | 800.49308  | 800.49546  | 800.49704  | 800.49495  | 800.49508  | 800.49538  | 800.49508  | 800.49471  | 800.49517  | $1.46 \times 10^{-4}$ |
|              | RT(min)     | 10.83      | 10.81      | 10.85      | 10.87      | 10.81      | 10.86      | 10.93      | 10.95      | 10.85      | 10.89      | $4.32 \times 10^{-1}$ |
|              | Peak area   | 104954316  | 98481490   | 104232277  | 103086926  | 102544917  | 101768074  | 100029418  | 99264788   | 99795025   | 99269551   | 2.25                  |
| peak 14(Re)  | MS accuracy | 946.55122  | 946.55109  | 946.55367  | 946.55462  | 946.55343  | 946.55311  | 946.55436  | 946.55390  | 946.55415  | 946.55340  | $1.29 \times 10^{-4}$ |
|              | RT(min)     | 11.70      | 11.70      | 11.72      | 11.74      | 11.71      | 11.74      | 11.78      | 11.79      | 11.71      | 11.75      | $2.73 \times 10^{-1}$ |
|              | Peak area   | 76607661   | 72648717   | 77489582   | 76135696   | 76523550   | 75786941   | 74393491   | 73026515   | 74342989   | 73553248   | 2.23                  |
| peak 27 (Rf) | MS accuracy | 800.49304  | 800.49290  | 800.49574  | 800.49440  | 800.49524  | 800.49504  | 800.49409  | 800.49520  | 800.49403  | 800.49498  | $1.19 \times 10^{-4}$ |
|              | RT(min)     | 18.65      | 18.65      | 18.64      | 18.64      | 18.63      | 18.66      | 18.67      | 18.66      | 18.65      | 18.66      | $6.42 \times 10^{-2}$ |
|              | Peak area   | 28790682   | 27441278   | 29390796   | 29296699   | 28856501   | 28822708   | 28470863   | 28194414   | 28299646   | 28334538   | 2.00                  |
| peak 46(Rb1) | MS accuracy | 1108.60430 | 1108.60445 | 1108.60796 | 1108.60701 | 1108.60586 | 1108.60786 | 1108.60783 | 1108.60636 | 1108.60730 | 1108.60627 | $1.21 \times 10^{-4}$ |
|              | RT(min)     | 22.70      | 22.70      | 22.70      | 22.70      | 22.71      | 22.75      | 22.74      | 22.73      | 22.73      | 22.75      | $9.38 \times 10^{-2}$ |
|              | Peak area   | 19099289   | 18536386   | 19789290   | 19433051   | 19622146   | 19474279   | 19308590   | 18868514   | 19080411   | 19071874   | 1.94                  |
| peak 50(Rc)  | MS accuracy | 1078.59314 | 1078.59310 | 1078.59548 | 1078.59522 | 1078.59588 | 1078.59617 | 1078.59575 | 1078.59556 | 1078.59689 | 1078.59591 | $1.15 \times 10^{-4}$ |
|              | RT(min)     | 24.01      | 24.00      | 24.02      | 24.01      | 24.00      | 24.05      | 24.07      | 24.06      | 24.05      | 24.06      | $1.14 \times 10^{-1}$ |
|              | Peak area   | 17472904   | 17019343   | 18109570   | 18052868   | 18026347   | 18050858   | 17712371   | 17466715   | 17514756   | 17685107   | 2.00                  |
| peak 56(Rb2) | MS accuracy | 1078.59327 | 1078.59312 | 1078.59509 | 1078.59566 | 1078.59684 | 1078.59574 | 1078.59735 | 1078.59487 | 1078.59543 | 1078.59654 | $1.29 \times 10^{-4}$ |
|              | RT(min)     | 25.67      | 25.66      | 25.68      | 25.66      | 25.66      | 25.71      | 25.72      | 25.71      | 25.70      | 25.73      | $1.05 \times 10^{-1}$ |
|              | Peak area   | 19476807   | 18557294   | 19919615   | 20125461   | 20073028   | 19841236   | 19583815   | 19527324   | 19468198   | 19524613   | 2.27                  |
| peak 64(Rd)  | MS accuracy | 946.55111  | 946.55088  | 946.55230  | 946.55242  | 946.55295  | 946.55269  | 946.55357  | 946.55296  | 946.55355  | 946.55412  | $1.10 \times 10^{-4}$ |
|              | RT(min)     | 28.76      | 28.72      | 28.78      | 28.74      | 28.75      | 28.79      | 28.79      | 28.79      | 28.79      | 28.82      | $1.04 \times 10^{-1}$ |
|              | Peak area   | 22393423   | 21322836   | 23145705   | 23057876   | 23148229   | 23055027   | 22538266   | 22461615   | 22836546   | 22785177   | 2.44                  |

**Table S2.** The classified and predicted results of ginsengs from three geographical origins using SVM model six quality markers.

| six quality markers (accuracy=100%) |        |            |        |        |            |
|-------------------------------------|--------|------------|--------|--------|------------|
| Sample                              | Actual | Recognized | Sample | Actual | Recognized |
| S1                                  | LN     | LN         | S17    | JL     | JL         |
| S2                                  | LN     | LN         | S18    | JL     | JL         |
| S3                                  | LN     | LN         | S19    | JL     | JL         |
| S4                                  | LN     | LN         | S20    | JL     | JL         |
| S5                                  | HLJ    | HLJ        | S21    | JL     | JL         |
| S6                                  | HLJ    | HLJ        | S22    | JL     | JL         |
| S7                                  | HLJ    | HLJ        | S23    | JL     | JL         |
| S8                                  | HLJ    | HLJ        | S24    | JL     | JL         |
| S9                                  | JL     | JL         | S25    | JL     | JL         |
| S10                                 | JL     | JL         | S26    | JL     | JL         |
| S11                                 | JL     | JL         | S27    | JL     | JL         |
| S12                                 | JL     | JL         | S28    | JL     | JL         |
| S13                                 | HLJ    | HLJ        | S29    | JL     | JL         |
| S14                                 | HLJ    | HLJ        | S30    | JL     | JL         |
| S15                                 | HLJ    | HLJ        | S31    | JL     | JL         |
| S16                                 | HLJ    | HLJ        |        |        |            |
